# Supplementary material for: The Equilibrium Molecular Structure of Cyclic (Alkyl)(Amino) Carbene Copper(I) Chloride via Gas-Phase Electron Diffraction and Quantum Chemical Calculations
Source: MDPI journal article supplement (doi:10.3390/molecules28196897), 2023-10-01
Supplement: s1 [file s1]

**Supporting Information for**

**The equilibrium molecular structure of Cyclic  
(Alkyl)(amino)carbene Copper(I) Chloride by gas-  
phase electron diffraction and quantum-chemical  
calculations**

Alexander V. Belyakov, Ekaterina P. Altova, Anatoliy. N. Rykov, Pavel Yu.

Sharanov, Igor F. Shishkov and Alexander S. Romanov

## S1. Gas-electron diffraction experiment

**Table S1.** Experimental conditions of the gas-phase electron diffraction experiment for **1**

|                                                       | <b>1</b>            |                     |
|-------------------------------------------------------|---------------------|---------------------|
|                                                       | LD                  | SD                  |
| Camera distance (mm)                                  | 362.3               | 193.9               |
| Nozzle temperature (K)                                | 492                 | 498                 |
| Accelerating voltage (kV)                             | 60                  | 60                  |
| Vacuum (mm Hg)                                        | $4.0 \cdot 10^{-5}$ | $3.0 \cdot 10^{-5}$ |
| Electron beam current ( $\mu\text{A}$ )               | 3.0                 | 3.0                 |
| Electron wavelength ( $\text{\AA}$ )                  | 0.0496975           | 0.0499395           |
| Number of films used                                  | 3                   | 1                   |
| Range of $s$ value ( $\text{\AA}^{-1}$ ) <sup>a</sup> | 4.2 – 16.0          | 13.0 – 31.6         |

<sup>a</sup>  $s = (4\pi/\lambda)\sin(\theta/2)$ , where  $\theta$  is the scattering angle and  $\lambda$  is the electron wavelength. Experimental intensity curves were digitized with a step of  $0.2 \text{ \AA}^{-1}$ .

## S2. Quantum chemical calculations and GED data

**Table S2.** Cartesian coordinates of (**1**) molecule, ( $r_e$ , Å) optimized at the RI-MP2/def2-QZVPP and MN15/def2TZVP, (DFT) levels of theory.

**Table S3.** Cartesian coordinates of (**1**) molecule, ( $r_e$ , Å) by gas-phase electron diffraction, (GED).

**Table S4.** Total corrections  $\Delta(r_{ij,e} - r_{ij,a})$  to internuclear distances  $r_{ij,a}$ , theoretical  $u_{ij,h1}$  and experimental  $u_{ij,exp}$  rms vibrational amplitudes (Å) for (**1**) molecule.

**Table S5.** Natural Bond Order: (total/covalent/ionic)

**Table S6.** Total scattering intensities and background lines for (1) molecule

**Table S2.** Cartesian coordinates of (**1**) molecule, ( $r_e$ , Å) optimized at the RI-MP2/def2-QZVPP and MN15/def2TZVP, (DFT) levels of theory.

| At   | MP2      |          |          | DFT      |          |          |
|------|----------|----------|----------|----------|----------|----------|
|      | $x$      | $y$      | $z$      | $x$      | $y$      | $z$      |
| C1   | 0.09440  | -3.20878 | -0.30523 | 0.98535  | 3.00001  | -0.54240 |
| C2   | -1.20380 | -2.43958 | -0.03498 | 1.98894  | 1.85282  | -0.32856 |
| C3   | -0.79139 | -0.99609 | -0.04690 | 1.12911  | 0.62302  | -0.20018 |
| N4   | 0.50887  | -0.93990 | -0.02994 | -0.11441 | 0.98985  | -0.07060 |
| C5   | 1.24038  | -2.24745 | -0.00654 | -0.38314 | 2.46745  | -0.09740 |
| C6   | 1.20975  | 0.30638  | 0.00665  | -1.17665 | 0.03367  | 0.13285  |
| C7   | 1.57761  | 0.89468  | -1.20753 | -1.84569 | -0.47505 | -0.98845 |
| C8   | 2.32305  | 2.06642  | -1.15099 | -2.92000 | -1.33277 | -0.76882 |
| C9   | 2.66640  | 2.63971  | 0.06017  | -3.29685 | -1.69501 | 0.51440  |
| C10  | 2.21584  | 2.07787  | 1.24071  | -2.56174 | -1.24886 | 1.60003  |
| C11  | 1.46387  | 0.90798  | 1.24363  | -1.47647 | -0.39111 | 1.43451  |
| C12  | 1.08193  | 0.39483  | -2.53497 | -1.36664 | -0.24859 | -2.40807 |
| C13  | 2.19602  | 0.23584  | -3.55456 | -2.48167 | 0.22186  | -3.33916 |
| C14  | 0.01250  | 1.34488  | -3.05781 | -0.74665 | -1.54473 | -2.93746 |
| C15  | 0.84438  | 0.43394  | 2.52780  | -0.59961 | -0.08578 | 2.63266  |
| C16  | -0.23296 | 1.42096  | 2.95837  | 0.13219  | -1.36306 | 3.05538  |
| C17  | 1.86083  | 0.25086  | 3.64135  | -1.38098 | 0.47799  | 3.81743  |
| C18  | 1.86814  | -2.45921 | 1.35538  | -0.79881 | 2.95089  | 1.28625  |
| C19  | 2.32642  | -2.28003 | -1.05766 | -1.49099 | 2.80993  | -1.08211 |
| C20  | -2.25366 | -2.69548 | -1.09856 | 2.96171  | 1.69447  | -1.49165 |
| C21  | -1.78989 | -2.73513 | 1.33982  | 2.77403  | 1.98140  | 0.98074  |
| Cu22 | -1.83835 | 0.46390  | -0.06155 | 1.69902  | -1.19019 | -0.18593 |
| Cl23 | -2.99318 | 2.15969  | -0.09916 | 2.28543  | -3.20821 | -0.18316 |
| H24  | 0.60852  | -0.57110 | -2.38332 | -0.57898 | 0.50841  | -2.39644 |
| H25  | 1.80297  | -0.18904 | -4.47421 | -2.07657 | 0.44827  | -4.32725 |
| H26  | 2.63367  | 1.19808  | -3.80445 | -3.23380 | -0.55943 | -3.46784 |
| H27  | 2.99200  | -0.40706 | -3.19182 | -2.98582 | 1.11201  | -2.95877 |
| H28  | -0.39854 | 0.97285  | -3.99297 | -0.34761 | -1.39312 | -3.94243 |
| H29  | -0.79929 | 1.46150  | -2.34537 | 0.05999  | -1.90067 | -2.29134 |
| H30  | 0.43739  | 2.32859  | -3.24179 | -1.50420 | -2.33097 | -2.98742 |
| H31  | 0.35632  | -0.51722 | 2.34146  | 0.15772  | 0.64226  | 2.33542  |
| H32  | -0.73876 | 1.06008  | 3.85044  | 0.81658  | -1.15244 | 3.87967  |
| H33  | 0.20866  | 2.38760  | 3.18804  | -0.58629 | -2.11360 | 3.39468  |
| H34  | -0.97417 | 1.57073  | 2.17861  | 0.70327  | -1.79788 | 2.23129  |
| H35  | 2.61858  | 2.54887  | -2.07001 | -3.45012 | -1.74246 | -1.62061 |
| H36  | 3.25013  | 3.54657  | 0.08218  | -4.13679 | -2.36119 | 0.66524  |
| H37  | 2.42753  | 2.56987  | 2.17768  | -2.81218 | -1.59354 | 2.59651  |
| H38  | -2.50922 | -3.75255 | -1.12068 | 3.57436  | 2.59328  | -1.59544 |
| H39  | -3.15422 | -2.12486 | -0.89236 | 3.61948  | 0.83927  | -1.32165 |
| H40  | -1.89018 | -2.40858 | -2.08164 | 2.42665  | 1.53047  | -2.43006 |

(to be continued)

**Table S2.** *continued*

| At  | MP2      |          |          | DFT      |          |          |
|-----|----------|----------|----------|----------|----------|----------|
|     | <i>x</i> | <i>y</i> | <i>z</i> | <i>x</i> | <i>y</i> | <i>z</i> |
| H41 | −2.11698 | −3.77158 | 1.37967  | 3.42653  | 2.85625  | 0.93304  |
| H42 | −1.06449 | −2.57550 | 2.13260  | 2.11046  | 2.09261  | 1.84139  |
| H43 | −2.64428 | −2.09319 | 1.53203  | 3.38932  | 1.09347  | 1.14032  |
| H44 | 0.13306  | −3.49833 | −1.35304 | 1.25980  | 3.90104  | 0.00971  |
| H45 | 0.17150  | −4.11288 | 0.29237  | 0.94637  | 3.25820  | −1.60421 |
| H46 | 2.82885  | −3.24170 | −1.00217 | −1.65442 | 3.88871  | −1.05993 |
| H47 | 1.92142  | −2.16844 | −2.05649 | −1.22545 | 2.52889  | −2.10082 |
| H48 | 3.06428  | −1.50081 | −0.88531 | −2.42706 | 2.31732  | −0.80912 |
| H49 | 2.41003  | −3.40062 | 1.34489  | −1.01266 | 4.01961  | 1.23626  |
| H50 | 2.57509  | −1.66498 | 1.57575  | −1.70622 | 2.43718  | 1.61012  |
| H51 | 1.12827  | −2.50095 | 2.14637  | −0.01849 | 2.79293  | 2.03081  |
| H52 | 1.37324  | −0.14208 | 4.52942  | −0.69724 | 0.72971  | 4.63032  |
| H53 | 2.66019  | −0.42844 | 3.36310  | −1.94742 | 1.37274  | 3.55526  |
| H54 | 2.31218  | 1.20080  | 3.91342  | −2.08498 | −0.26258 | 4.20317  |

**Table S3.** Cartesian coordinates of (**1**) molecule, ( $r_e$ , Å) by gas-phase electron diffraction, (GED).

| GED  |          |          |          |     |          |          |          |
|------|----------|----------|----------|-----|----------|----------|----------|
| At   | $x$      | $y$      | $z$      | At  | $x$      | $y$      | $z$      |
| C1   | 0.00000  | 0.00000  | 0.00000  | H28 | −1.89742 | 3.43697  | −3.89435 |
| C2   | −1.55496 | 0.00000  | 0.00000  | H29 | −2.77241 | 3.63666  | −2.35999 |
| C3   | −1.93272 | 1.47568  | 0.00000  | H30 | −1.99331 | 5.03068  | −3.12147 |
| N4   | −0.84409 | 2.18529  | 0.25133  | H31 | −1.60931 | 2.47681  | 2.59835  |
| C5   | 0.44552  | 1.40798  | 0.46165  | H32 | −3.58677 | 3.28437  | 3.79321  |
| C6   | −0.88991 | 3.63279  | 0.35946  | H33 | −3.32498 | 4.92274  | 3.16752  |
| C7   | −0.66211 | 4.33174  | −0.83263 | H34 | −3.75234 | 3.61469  | 2.05531  |
| C8   | −0.62166 | 5.72134  | −0.76305 | H35 | −0.45350 | 6.29031  | −1.66453 |
| C9   | −0.82285 | 6.38615  | 0.43557  | H36 | −0.78148 | 7.46354  | 0.46909  |
| C10  | −1.12847 | 5.66836  | 1.57987  | H37 | −1.35443 | 6.19652  | 2.49347  |
| C11  | −1.18635 | 4.27689  | 1.56760  | H38 | −1.80769 | −1.73660 | −1.24340 |
| C12  | −0.60488 | 3.66857  | −2.17785 | H39 | −3.22106 | −0.65764 | −1.20386 |
| C13  | 0.59566  | 4.10571  | −2.99551 | H40 | −1.78826 | −0.20294 | −2.14121 |
| C14  | −1.89513 | 3.95678  | −2.93053 | H41 | −1.90735 | −1.69046 | 1.28327  |
| C15  | −1.69913 | 3.55148  | 2.77724  | H42 | −1.74780 | −0.15896 | 2.16654  |
| C16  | −3.17875 | 3.85837  | 2.95464  | H43 | −3.23242 | −0.50386 | 1.26573  |
| C17  | −0.93786 | 3.90197  | 4.04184  | H44 | 0.36539  | −0.17612 | −1.01792 |
| C18  | 0.84415  | 1.46769  | 1.91976  | H45 | 0.41661  | −0.78007 | 0.64480  |
| C19  | 1.56630  | 1.97523  | −0.37629 | H46 | 2.46980  | 1.38686  | −0.18889 |
| C20  | −2.12779 | −0.68898 | −1.22101 | H47 | 1.34080  | 1.92079  | −1.44291 |
| C21  | −2.14502 | −0.62129 | 1.25765  | H48 | 1.77403  | 3.01618  | −0.10798 |
| Cu22 | −3.56706 | 2.24746  | −0.26655 | H49 | 1.78289  | 0.92021  | 2.04797  |
| Cl23 | −5.39186 | 3.16706  | −0.58262 | H50 | 1.00942  | 2.50370  | 2.22945  |
| H24  | −0.55082 | 2.58598  | −2.02792 | H51 | 0.09304  | 1.01833  | 2.57248  |
| H25  | 0.63261  | 3.54883  | −3.93708 | H52 | −1.31354 | 3.30931  | 4.88201  |
| H26  | 0.53061  | 5.16831  | −3.24818 | H53 | 0.13555  | 3.71834  | 3.94546  |
| H27  | 1.53651  | 3.94563  | −2.46161 | H54 | −1.07481 | 4.95657  | 4.29968  |

**Table S4.** Total corrections  $\Delta(r_{ij,e} - r_{ij,a})$  to internuclear distances  $r_{ij,a}$ , theoretical  $u_{ij,h1}$  and experimental  $u_{ij,exp}$  rms vibrational amplitudes (Å) for molecule (**1**)

| Type | At.Num. | $r_{ij,a}$ | $r_{ij,e} - r_{ij,a}^a$ | $u_{ij,exp}$ | $u_{ij,h1}^b$ |
|------|---------|------------|-------------------------|--------------|---------------|
| C C  | 1- 2    | 1.567      | -0.0123                 | 0.054        | 0.054         |
| C C  | 2- 3    | 1.532      | -0.0083                 | 0.053        | 0.053         |
| N C  | 3- 4    | 1.330      | -0.0060                 | 0.042        | 0.042         |
| N C  | 4- 5    | 1.536      | -0.0155                 | 0.055        | 0.055         |
| C C  | 1- 5    | 1.557      | -0.0096                 | 0.054        | 0.053         |
| N C  | 4- 6    | 1.462      | -0.0095                 | 0.049        | 0.049         |
| C C  | 6- 7    | 1.411      | -0.0101                 | 0.047        | 0.047         |
| C C  | 7- 8    | 1.399      | -0.0070                 | 0.047        | 0.046         |
| C C  | 8- 9    | 1.392      | -0.0063                 | 0.046        | 0.045         |
| C C  | 9-10    | 1.391      | -0.0061                 | 0.046        | 0.045         |
| C C  | 10-11   | 1.400      | -0.0070                 | 0.047        | 0.046         |
| C C  | 6-11    | 1.408      | -0.0076                 | 0.047        | 0.047         |
| C C  | 7-12    | 1.514      | -0.0130                 | 0.053        | 0.052         |
| C C  | 12-13   | 1.532      | -0.0152                 | 0.053        | 0.053         |
| C C  | 12-14   | 1.534      | -0.0123                 | 0.054        | 0.053         |
| C C  | 11-15   | 1.512      | -0.0112                 | 0.053        | 0.052         |
| C C  | 15-16   | 1.534      | -0.0125                 | 0.054        | 0.053         |
| C C  | 15-17   | 1.532      | -0.0147                 | 0.053        | 0.053         |
| C C  | 5-18    | 1.525      | -0.0120                 | 0.053        | 0.053         |
| C C  | 5-19    | 1.521      | -0.0108                 | 0.053        | 0.052         |
| C C  | 2-20    | 1.530      | -0.0153                 | 0.053        | 0.053         |
| C C  | 2-21    | 1.534      | -0.0123                 | 0.054        | 0.053         |
| CuC  | 3-22    | 1.848      | -0.0205                 | 0.056        | 0.063         |
| CuCl | 22-23   | 2.078      | -0.0098                 | 0.060        | 0.057         |
| C H  | 12-24   | 1.111      | -0.0168                 | 0.079        | 0.076         |
| CuN  | 4-22    | 2.794      | -0.0216                 | 0.098        | 0.098         |
| CuC  | 2-22    | 3.031      | -0.0027                 | 0.111        | 0.110         |
| CuC  | 6-22    | 3.062      | 0.0167                  | 0.184        | 0.183         |
| CuC  | 20-22   | 3.389      | 0.0181                  | 0.201        | 0.201         |
| CuC  | 21-22   | 3.520      | 0.0259                  | 0.196        | 0.196         |
| CuC  | 16-22   | 3.629      | -0.0070                 | 0.273        | 0.273         |
| CuC  | 11-22   | 3.601      | 0.0257                  | 0.252        | 0.252         |
| CuC  | 7-22    | 3.538      | 0.0818                  | 0.256        | 0.256         |
| CuC  | 14-22   | 3.490      | 0.0895                  | 0.294        | 0.294         |
| CuC  | 15-22   | 3.854      | -0.0525                 | 0.268        | 0.268         |
| CuC  | 12-22   | 3.747      | 0.0537                  | 0.271        | 0.271         |
| CuC  | 5-22    | 4.190      | -0.0268                 | 0.106        | 0.088         |
| CuC  | 1-22    | 4.240      | -0.0153                 | 0.109        | 0.092         |
| CuC  | 10-22   | 4.515      | 0.0737                  | 0.323        | 0.306         |
| CuC  | 8-22    | 4.465      | 0.1164                  | 0.328        | 0.310         |
| CuC  | 18-22   | 5.010      | -0.0249                 | 0.168        | 0.150         |
| CuC  | 9-22    | 4.905      | 0.1101                  | 0.339        | 0.322         |
| CuC  | 19-22   | 5.180      | -0.0378                 | 0.165        | 0.147         |
| CuC  | 17-22   | 5.377      | -0.0651                 | 0.294        | 0.276         |
| CuC  | 13-22   | 5.268      | 0.0453                  | 0.293        | 0.275         |
| ClN  | 4-23    | 4.753      | -0.0267                 | 0.245        | 0.227         |
| ClC  | 3-23    | 3.903      | -0.0091                 | 0.089        | 0.089         |
| ClC  | 16-23   | 4.251      | -0.0216                 | 0.352        | 0.682         |

(to be contined)

**Table S4. *continued***

| <i>Type</i> | <i>At.Num.</i> | $r_{ij,a}$ | $r_{ij,e} - r_{ij,a}^a$ | $u_{ij,exp}$ | $u_{ij,hl}^b$ |
|-------------|----------------|------------|-------------------------|--------------|---------------|
| ClC         | 14-23          | 4.284      | 0.0013                  | 0.352        | 0.767         |
| ClC         | 11-23          | 4.833      | 0.0187                  | 0.352        | 0.558         |
| ClC         | 7-23           | 4.838      | 0.0392                  | 0.352        | 0.610         |
| ClC         | 2-23           | 4.965      | 0.0440                  | 0.209        | 0.191         |
| ClC         | 15-23          | 5.043      | -0.0355                 | 0.352        | 0.572         |
| ClC         | 20-23          | 5.011      | 0.0817                  | 0.352        | 0.396         |
| ClC         | 12-23          | 5.070      | 0.0010                  | 0.352        | 0.646         |
| ClC         | 21-23          | 5.208      | 0.1095                  | 0.352        | 0.401         |
| ClC         | 10-23          | 5.313      | 0.0827                  | 0.352        | 0.712         |
| ClC         | 8-23           | 5.314      | 0.0996                  | 0.352        | 0.755         |
| ClC         | 9-23           | 5.564      | 0.1171                  | 0.345        | 0.778         |
| ClC         | 5-23           | 6.203      | -0.0178                 | 0.204        | 0.182         |
| ClC         | 1-23           | 6.260      | 0.0202                  | 0.145        | 0.124         |
| ClC         | 17-23          | 6.485      | -0.0228                 | 0.345        | 0.603         |
| ClC         | 13-23          | 6.511      | 0.0120                  | 0.345        | 0.682         |
| ClC         | 18-23          | 6.944      | -0.0132                 | 0.292        | 0.271         |
| ClC         | 19-23          | 7.108      | -0.0450                 | 0.341        | 0.320         |
| N C         | 2- 4           | 2.327      | -0.0148                 | 0.053        | 0.056         |
| N C         | 1- 4           | 2.368      | -0.0120                 | 0.061        | 0.064         |
| N C         | 4- 7           | 2.420      | -0.0087                 | 0.063        | 0.066         |
| N C         | 4-11           | 2.511      | -0.0164                 | 0.063        | 0.065         |
| N C         | 4-18           | 2.508      | -0.0279                 | 0.078        | 0.081         |
| N C         | 4-19           | 2.523      | -0.0236                 | 0.078        | 0.081         |
| N C         | 4-12           | 2.877      | -0.0202                 | 0.106        | 0.106         |
| N C         | 4-15           | 3.024      | -0.0278                 | 0.103        | 0.103         |
| N C         | 4-21           | 3.313      | -0.0603                 | 0.136        | 0.136         |
| N C         | 4-20           | 3.439      | 0.0366                  | 0.115        | 0.115         |
| N C         | 4- 8           | 3.697      | -0.0113                 | 0.069        | 0.069         |
| N C         | 4-10           | 3.756      | -0.0169                 | 0.069        | 0.069         |
| N C         | 4-14           | 3.782      | 0.0083                  | 0.202        | 0.202         |
| N C         | 4-16           | 3.919      | 0.0250                  | 0.198        | 0.197         |
| N C         | 4-13           | 4.079      | -0.0410                 | 0.149        | 0.131         |
| N C         | 4-17           | 4.218      | -0.0554                 | 0.155        | 0.138         |
| N C         | 4- 9           | 4.220      | -0.0154                 | 0.091        | 0.073         |
| C C         | 6-10           | 2.395      | -0.0093                 | 0.056        | 0.059         |
| C C         | 6- 8           | 2.396      | -0.0098                 | 0.056        | 0.059         |
| C C         | 3- 5           | 2.438      | -0.0143                 | 0.056        | 0.059         |
| C C         | 3- 6           | 2.413      | 0.0098                  | 0.066        | 0.069         |
| C C         | 8-10           | 2.405      | -0.0069                 | 0.055        | 0.058         |
| C C         | 1- 3           | 2.443      | -0.0115                 | 0.062        | 0.065         |
| C C         | 7- 9           | 2.430      | -0.0101                 | 0.055        | 0.058         |
| C C         | 9-11           | 2.431      | -0.0092                 | 0.055        | 0.058         |
| C C         | 3-21           | 2.476      | -0.0211                 | 0.089        | 0.092         |
| C C         | 2- 5           | 2.511      | -0.0213                 | 0.060        | 0.063         |
| C C         | 7-11           | 2.469      | -0.0116                 | 0.056        | 0.059         |
| C C         | 18-19          | 2.474      | -0.0140                 | 0.078        | 0.081         |
| C C         | 7-14           | 2.492      | -0.0300                 | 0.083        | 0.086         |
| C C         | 11-16          | 2.492      | -0.0284                 | 0.082        | 0.085         |
| C C         | 3-20           | 2.484      | 0.0094                  | 0.089        | 0.092         |
| C C         | 20-21          | 2.510      | -0.0307                 | 0.084        | 0.087         |

*(to be continued)*



**Table S4. *continued***

| <i>Type</i> | <i>At.Num.</i> | $r_{ij,a}$ | $r_{ij,c} - r_{ij,a}^a$ | $u_{ij,exp}$ | $u_{ij,hl}^b$ |
|-------------|----------------|------------|-------------------------|--------------|---------------|
| C C         | 16-17          | 2.518      | -0.0267                 | 0.082        | 0.085         |
| C C         | 10-15          | 2.506      | -0.0078                 | 0.067        | 0.070         |
| C C         | 13-14          | 2.511      | -0.0145                 | 0.082        | 0.085         |
| C C         | 8-12           | 2.501      | -0.0076                 | 0.067        | 0.070         |
| C C         | 7-13           | 2.532      | -0.0200                 | 0.078        | 0.081         |
| C C         | 11-17          | 2.523      | -0.0078                 | 0.079        | 0.082         |
| C C         | 1-20           | 2.559      | -0.0107                 | 0.082        | 0.085         |
| C C         | 1-19           | 2.570      | -0.0214                 | 0.079        | 0.082         |
| C C         | 1-18           | 2.561      | -0.0012                 | 0.082        | 0.085         |
| C C         | 1-21           | 2.593      | -0.0302                 | 0.084        | 0.087         |
| C C         | 6-12           | 2.579      | -0.0258                 | 0.068        | 0.071         |
| C C         | 6-15           | 2.570      | -0.0186                 | 0.068        | 0.071         |
| C C         | 5- 6           | 2.637      | -0.0401                 | 0.074        | 0.077         |
| C C         | 6- 9           | 2.766      | -0.0108                 | 0.067        | 0.067         |
| C C         | 7-10           | 2.807      | -0.0100                 | 0.067        | 0.067         |
| C C         | 8-11           | 2.808      | -0.0085                 | 0.068        | 0.067         |
| C C         | 6-19           | 3.083      | -0.0294                 | 0.128        | 0.128         |
| C C         | 8-13           | 3.016      | -0.0037                 | 0.127        | 0.127         |
| C C         | 10-17          | 3.018      | 0.0178                  | 0.132        | 0.131         |
| C C         | 10-16          | 3.109      | -0.0478                 | 0.147        | 0.147         |
| C C         | 8-14           | 3.105      | -0.0333                 | 0.147        | 0.147         |
| C C         | 6-18           | 3.279      | -0.0966                 | 0.141        | 0.141         |
| C C         | 3-11           | 3.307      | -0.0111                 | 0.117        | 0.117         |
| C C         | 3- 7           | 3.180      | 0.0549                  | 0.121        | 0.121         |
| C C         | 7-19           | 3.350      | -0.0745                 | 0.167        | 0.166         |
| C C         | 15-18          | 3.465      | -0.0675                 | 0.180        | 0.180         |
| C C         | 12-19          | 3.373      | -0.0830                 | 0.189        | 0.189         |
| C C         | 3-18           | 3.391      | -0.0147                 | 0.118        | 0.117         |
| C C         | 5-21           | 3.461      | -0.0757                 | 0.143        | 0.142         |
| C C         | 3-15           | 3.545      | -0.0696                 | 0.170        | 0.170         |
| C C         | 2-18           | 3.435      | -0.0299                 | 0.130        | 0.130         |
| C C         | 5- 7           | 3.434      | -0.0497                 | 0.111        | 0.111         |
| C C         | 11-18          | 3.615      | -0.1312                 | 0.185        | 0.185         |
| C C         | 5-11           | 3.535      | -0.0541                 | 0.112        | 0.112         |
| C C         | 3-12           | 3.309      | 0.0547                  | 0.173        | 0.173         |
| C C         | 6-14           | 3.486      | -0.0310                 | 0.154        | 0.154         |
| C C         | 6-16           | 3.479      | -0.0114                 | 0.151        | 0.151         |
| C C         | 3-19           | 3.575      | -0.0207                 | 0.104        | 0.104         |
| C C         | 17-18          | 3.843      | -0.1544                 | 0.241        | 0.241         |
| C C         | 13-19          | 3.644      | -0.1314                 | 0.241        | 0.241         |
| C C         | 2- 6           | 3.720      | -0.0090                 | 0.069        | 0.069         |
| C C         | 5-12           | 3.664      | -0.0332                 | 0.150        | 0.149         |
| C C         | 18-21          | 3.809      | -0.1024                 | 0.257        | 0.257         |
| C C         | 2-19           | 3.727      | -0.0137                 | 0.099        | 0.099         |
| C C         | 5-20           | 3.700      | 0.0217                  | 0.103        | 0.102         |
| C C         | 6-17           | 3.708      | -0.0153                 | 0.106        | 0.105         |
| C C         | 6-13           | 3.724      | -0.0248                 | 0.105        | 0.105         |
| C C         | 1- 6           | 3.775      | -0.0177                 | 0.077        | 0.076         |
| C C         | 5-15           | 3.853      | -0.0377                 | 0.142        | 0.142         |
| C C         | 9-15           | 3.790      | -0.0101                 | 0.073        | 0.073         |

*(to be continued)*

**Table S4. continued**

| <i>Type</i> | <i>At.Num.</i> | $r_{ij,a}$ | $r_{ij,e} - r_{ij,a}^a$ | $u_{ij,exp}$ | $u_{ij,h}^b$ |
|-------------|----------------|------------|-------------------------|--------------|--------------|
| C C         | 9-12           | 3.788      | -0.0112                 | 0.073        | 0.072        |
| C C         | 11-12          | 3.864      | -0.0250                 | 0.074        | 0.074        |
| C C         | 7-15           | 3.857      | -0.0213                 | 0.075        | 0.074        |
| C C         | 3-16           | 3.984      | 0.0111                  | 0.242        | 0.242        |
| C C         | 3-14           | 3.735      | 0.1050                  | 0.260        | 0.260        |
| C C         | 11-19          | 4.098      | -0.0167                 | 0.201        | 0.183        |
| C C         | 7-18           | 4.368      | -0.1199                 | 0.199        | 0.181        |
| C C         | 9-16           | 4.323      | -0.0464                 | 0.179        | 0.161        |
| C C         | 10-12          | 4.306      | -0.0169                 | 0.096        | 0.078        |
| C C         | 8-15           | 4.304      | -0.0137                 | 0.096        | 0.079        |
| C C         | 15-21          | 4.701      | -0.2378                 | 0.352        | 0.376        |
| C C         | 9-14           | 4.324      | -0.0362                 | 0.179        | 0.161        |
| C C         | 8-19           | 4.437      | -0.0811                 | 0.243        | 0.225        |
| C C         | 1-12           | 4.264      | 0.0446                  | 0.245        | 0.227        |
| C C         | 2-15           | 4.639      | -0.1282                 | 0.229        | 0.212        |
| C C         | 9-13           | 4.357      | 0.0002                  | 0.151        | 0.134        |
| C C         | 9-17           | 4.359      | 0.0216                  | 0.155        | 0.137        |
| C C         | 2-12           | 4.265      | 0.1056                  | 0.233        | 0.215        |
| C C         | 5-13           | 4.461      | -0.0730                 | 0.200        | 0.182        |
| C C         | 1- 7           | 4.451      | 0.0091                  | 0.153        | 0.136        |
| C C         | 5-17           | 4.668      | -0.0902                 | 0.202        | 0.185        |
| C C         | 2-11           | 4.626      | -0.0564                 | 0.140        | 0.123        |
| C C         | 6-21           | 4.609      | -0.0833                 | 0.191        | 0.173        |
| C C         | 3-10           | 4.542      | 0.0105                  | 0.139        | 0.121        |
| C C         | 2- 7           | 4.443      | 0.0571                  | 0.140        | 0.123        |
| C C         | 3- 8           | 4.452      | 0.0570                  | 0.143        | 0.126        |
| C C         | 10-18          | 4.825      | -0.1716                 | 0.266        | 0.248        |
| C C         | 11-14          | 4.601      | -0.0358                 | 0.194        | 0.176        |
| C C         | 7-16           | 4.594      | -0.0218                 | 0.193        | 0.175        |
| C C         | 5- 8           | 4.674      | -0.0652                 | 0.152        | 0.135        |
| C C         | 19-20          | 4.569      | 0.0634                  | 0.225        | 0.207        |
| C C         | 5-10           | 4.747      | -0.0694                 | 0.156        | 0.138        |
| C C         | 1-11           | 4.755      | -0.0482                 | 0.122        | 0.105        |
| C C         | 1-15           | 4.890      | -0.0716                 | 0.196        | 0.178        |
| C C         | 16-18          | 4.791      | 0.0013                  | 0.231        | 0.214        |
| C C         | 3-17           | 4.925      | -0.1069                 | 0.227        | 0.209        |
| C C         | 6-20           | 4.683      | 0.0823                  | 0.167        | 0.149        |
| C C         | 16-21          | 4.977      | -0.0763                 | 0.352        | 0.440        |
| C C         | 15-19          | 4.795      | 0.0108                  | 0.203        | 0.185        |
| C C         | 14-19          | 4.795      | -0.0583                 | 0.231        | 0.213        |
| C C         | 12-20          | 4.424      | 0.2905                  | 0.352        | 0.387        |
| C C         | 3-13           | 4.692      | 0.0283                  | 0.212        | 0.194        |
| C C         | 19-21          | 4.878      | -0.0625                 | 0.142        | 0.125        |
| C C         | 18-20          | 4.841      | -0.0093                 | 0.135        | 0.117        |
| C C         | 5-14           | 4.840      | 0.0058                  | 0.232        | 0.215        |
| C C         | 8-16           | 4.916      | -0.0346                 | 0.191        | 0.173        |
| C C         | 11-21          | 5.157      | -0.1559                 | 0.292        | 0.274        |
| C C         | 10-14          | 4.922      | -0.0372                 | 0.191        | 0.173        |
| C C         | 12-18          | 4.955      | -0.0833                 | 0.189        | 0.171        |
| C C         | 7-17           | 4.909      | -0.0075                 | 0.130        | 0.112        |
| C C         | 11-13          | 4.919      | -0.0177                 | 0.130        | 0.112        |

(to be continued)

**Table S4. *continued***

| <i>Type</i> | <i>At.Num.</i> | $r_{ij,a}$ | $r_{ij,e} - r_{ij,a}^a$ | $u_{ij,exp}$ | $u_{ij,h}^b$ |
|-------------|----------------|------------|-------------------------|--------------|--------------|
| C C         | 10-19          | 5.009      | -0.0362                 | 0.251        | 0.233        |
| C C         | 5-16           | 5.014      | 0.0209                  | 0.225        | 0.207        |
| C C         | 2-16           | 5.140      | -0.0166                 | 0.311        | 0.293        |
| C C         | 2-14           | 4.745      | 0.1911                  | 0.339        | 0.321        |
| C C         | 3- 9           | 5.015      | 0.0379                  | 0.136        | 0.119        |
| C C         | 14-20          | 4.552      | 0.4037                  | 0.352        | 0.494        |
| C C         | 9-19           | 5.146      | -0.0647                 | 0.269        | 0.251        |
| C C         | 12-15          | 5.117      | -0.0414                 | 0.113        | 0.095        |
| C C         | 5- 9           | 5.212      | -0.0750                 | 0.166        | 0.148        |
| C C         | 10-13          | 5.138      | -0.0048                 | 0.142        | 0.124        |
| C C         | 8-17           | 5.135      | 0.0127                  | 0.143        | 0.125        |
| C C         | 1-13           | 5.118      | -0.0009                 | 0.276        | 0.259        |
| C C         | 8-18           | 5.398      | -0.1592                 | 0.255        | 0.237        |
| C C         | 17-21          | 5.811      | -0.3643                 | 0.352        | 0.465        |
| C C         | 7-20           | 5.040      | 0.2043                  | 0.281        | 0.263        |
| C C         | 1-14           | 5.163      | 0.1125                  | 0.332        | 0.314        |
| C C         | 9-18           | 5.585      | -0.1835                 | 0.286        | 0.268        |
| C C         | 17-19          | 5.433      | -0.0012                 | 0.249        | 0.232        |
| C C         | 2-17           | 5.859      | -0.2069                 | 0.301        | 0.279        |
| C C         | 1-17           | 5.843      | -0.1477                 | 0.275        | 0.253        |
| C C         | 7-21           | 5.587      | -0.0103                 | 0.171        | 0.149        |
| C C         | 2-13           | 5.447      | 0.0718                  | 0.263        | 0.245        |
| C C         | 13-18          | 5.709      | -0.1248                 | 0.252        | 0.230        |
| C C         | 1-16           | 5.786      | 0.0214                  | 0.276        | 0.254        |
| C C         | 11-20          | 5.754      | 0.0190                  | 0.162        | 0.140        |
| C C         | 15-20          | 5.951      | -0.1069                 | 0.238        | 0.216        |
| C C         | 14-15          | 5.777      | -0.0514                 | 0.235        | 0.213        |
| C C         | 12-16          | 5.778      | -0.0335                 | 0.232        | 0.210        |
| C C         | 12-21          | 5.644      | 0.0640                  | 0.212        | 0.190        |
| C C         | 1- 8           | 5.809      | -0.0031                 | 0.155        | 0.133        |
| C C         | 2-10           | 5.934      | -0.0343                 | 0.136        | 0.114        |
| C C         | 2- 8           | 5.796      | 0.0515                  | 0.136        | 0.114        |
| C C         | 13-20          | 5.517      | 0.2759                  | 0.345        | 0.435        |
| C C         | 1-10           | 6.038      | -0.0466                 | 0.131        | 0.109        |
| C C         | 14-16          | 6.076      | -0.0514                 | 0.337        | 0.315        |
| C C         | 16-19          | 6.067      | 0.0284                  | 0.238        | 0.217        |
| C C         | 14-18          | 6.149      | -0.0476                 | 0.233        | 0.211        |
| C C         | 16-20          | 6.280      | -0.0173                 | 0.335        | 0.314        |
| C C         | 12-17          | 6.260      | -0.0273                 | 0.144        | 0.122        |
| C C         | 13-15          | 6.268      | -0.0307                 | 0.144        | 0.122        |
| C C         | 10-21          | 6.522      | -0.1430                 | 0.300        | 0.279        |
| C C         | 14-21          | 6.037      | 0.1726                  | 0.325        | 0.304        |
| C C         | 2- 9           | 6.432      | 0.0107                  | 0.117        | 0.095        |
| C C         | 1- 9           | 6.482      | -0.0285                 | 0.137        | 0.115        |
| C C         | 8-20           | 6.386      | 0.2152                  | 0.289        | 0.267        |
| C C         | 8-21           | 6.856      | -0.0276                 | 0.192        | 0.170        |
| C C         | 17-20          | 7.268      | -0.1837                 | 0.299        | 0.277        |
| C C         | 10-20          | 6.948      | 0.0708                  | 0.179        | 0.157        |
| C C         | 13-21          | 6.895      | 0.0297                  | 0.236        | 0.214        |
| C C         | 14-17          | 7.073      | -0.0347                 | 0.221        | 0.199        |

*(to be continued)*

**Table S4. continued**

| Type | At.Num. | $r_{ij,a}$ | $r_{ij,e} - r_{ij,a}^a$ | $u_{ij,exp}$ | $u_{ij,h1}^b$ |
|------|---------|------------|-------------------------|--------------|---------------|
| C C  | 13-16   | 7.078      | -0.0271                 | 0.220        | 0.198         |
| C C  | 9-21    | 7.266      | -0.0875                 | 0.245        | 0.223         |
| C C  | 13-17   | 7.217      | -0.0120                 | 0.200        | 0.179         |
| C C  | 9-20    | 7.229      | 0.1539                  | 0.228        | 0.206         |

<sup>a</sup> Calculated with the DFT- MN15/Def2SVPP cubic force constants (see text).<sup>b</sup> Calculated with the DFT- MN15/def2TZVP quadratic force constants (see text).**Table S5. Natural Bond Order: (total/covalent/ionic)**

| Atom  |   | 1      | 2      | 3      | 4      | 5      | 6      | 7      | 8      | 9      |
|-------|---|--------|--------|--------|--------|--------|--------|--------|--------|--------|
| 1. C  | t | 0.0000 | 1.0000 | 0.0000 | 0.0000 | 1.0000 | 0.0000 | 0.0000 | 0.0000 | 0.0000 |
|       | c | ---    | 0.9822 | 0.0000 | 0.0000 | 0.9924 | 0.0000 | 0.0000 | 0.0000 | 0.0000 |
|       | i | ---    | 0.0178 | 0.0000 | 0.0000 | 0.0076 | 0.0000 | 0.0000 | 0.0000 | 0.0000 |
| 2. C  | t | 1.0000 | 0.0000 | 1.0000 | 0.0000 | 0.0000 | 0.0000 | 0.0000 | 0.0000 | 0.0000 |
|       | c | 0.9822 | ---    | 0.9858 | 0.0000 | 0.0000 | 0.0000 | 0.0000 | 0.0000 | 0.0000 |
|       | i | 0.0178 | ---    | 0.0142 | 0.0000 | 0.0000 | 0.0000 | 0.0000 | 0.0000 | 0.0000 |
| 3. C  | t | 0.0000 | 1.0000 | 0.3687 | 1.6313 | 0.0000 | 0.0000 | 0.0000 | 0.0000 | 0.0000 |
|       | c | 0.0000 | 0.9858 | ---    | 1.0654 | 0.0000 | 0.0000 | 0.0000 | 0.0000 | 0.0000 |
|       | i | 0.0000 | 0.0142 | ---    | 0.5659 | 0.0000 | 0.0000 | 0.0000 | 0.0000 | 0.0000 |
| 4. N  | t | 0.0000 | 0.0000 | 1.6313 | 0.3687 | 1.0000 | 1.0000 | 0.0000 | 0.0000 | 0.0000 |
|       | c | 0.0000 | 0.0000 | 1.0654 | ---    | 0.7772 | 0.7985 | 0.0000 | 0.0000 | 0.0000 |
|       | i | 0.0000 | 0.0000 | 0.5659 | ---    | 0.2228 | 0.2015 | 0.0000 | 0.0000 | 0.0000 |
| 5. C  | t | 1.0000 | 0.0000 | 0.0000 | 1.0000 | 0.0000 | 0.0000 | 0.0000 | 0.0000 | 0.0000 |
|       | c | 0.9924 | 0.0000 | 0.0000 | 0.7772 | ---    | 0.0000 | 0.0000 | 0.0000 | 0.0000 |
|       | i | 0.0076 | 0.0000 | 0.0000 | 0.2228 | ---    | 0.0000 | 0.0000 | 0.0000 | 0.0000 |
| 6. C  | t | 0.0000 | 0.0000 | 0.0000 | 1.0000 | 0.0000 | 0.1128 | 1.2190 | 0.0000 | 0.0000 |
|       | c | 0.0000 | 0.0000 | 0.0000 | 0.7985 | 0.0000 | ---    | 1.1854 | 0.0000 | 0.0000 |
|       | i | 0.0000 | 0.0000 | 0.0000 | 0.2015 | 0.0000 | ---    | 0.0335 | 0.0000 | 0.0000 |
| 7. C  | t | 0.0000 | 0.0000 | 0.0000 | 0.0000 | 0.0000 | 1.2190 | 0.1140 | 1.5606 | 0.0000 |
|       | c | 0.0000 | 0.0000 | 0.0000 | 0.0000 | 0.0000 | 1.1854 | ---    | 1.5322 | 0.0000 |
|       | i | 0.0000 | 0.0000 | 0.0000 | 0.0000 | 0.0000 | 0.0335 | ---    | 0.0284 | 0.0000 |
| 8. C  | t | 0.0000 | 0.0000 | 0.0000 | 0.0000 | 0.0000 | 0.0000 | 1.5606 | 0.0995 | 1.2204 |
|       | c | 0.0000 | 0.0000 | 0.0000 | 0.0000 | 0.0000 | 0.0000 | 1.5322 | ---    | 1.2103 |
|       | i | 0.0000 | 0.0000 | 0.0000 | 0.0000 | 0.0000 | 0.0000 | 0.0284 | ---    | 0.0101 |
| 9. C  | t | 0.0000 | 0.0000 | 0.0000 | 0.0000 | 0.0000 | 0.0000 | 0.0000 | 1.2204 | 0.1088 |
|       | c | 0.0000 | 0.0000 | 0.0000 | 0.0000 | 0.0000 | 0.0000 | 0.0000 | 1.2103 | ---    |
|       | i | 0.0000 | 0.0000 | 0.0000 | 0.0000 | 0.0000 | 0.0000 | 0.0000 | 0.0101 | ---    |
| 10. C | t | 0.0000 | 0.0000 | 0.0000 | 0.0000 | 0.0000 | 0.0000 | 0.0000 | 0.0000 | 1.5580 |
|       | c | 0.0000 | 0.0000 | 0.0000 | 0.0000 | 0.0000 | 0.0000 | 0.0000 | 0.0000 | 1.5359 |
|       | i | 0.0000 | 0.0000 | 0.0000 | 0.0000 | 0.0000 | 0.0000 | 0.0000 | 0.0000 | 0.0221 |
| 11. C | t | 0.0000 | 0.0000 | 0.0000 | 0.0000 | 0.0000 | 1.5594 | 0.0000 | 0.0000 | 0.0000 |
|       | c | 0.0000 | 0.0000 | 0.0000 | 0.0000 | 0.0000 | 1.4907 | 0.0000 | 0.0000 | 0.0000 |
|       | i | 0.0000 | 0.0000 | 0.0000 | 0.0000 | 0.0000 | 0.0687 | 0.0000 | 0.0000 | 0.0000 |
| 12. C | t | 0.0000 | 0.0000 | 0.0000 | 0.0000 | 0.0000 | 0.0000 | 1.0000 | 0.0000 | 0.0000 |
|       | c | 0.0000 | 0.0000 | 0.0000 | 0.0000 | 0.0000 | 0.0000 | 0.9704 | 0.0000 | 0.0000 |
|       | i | 0.0000 | 0.0000 | 0.0000 | 0.0000 | 0.0000 | 0.0000 | 0.0296 | 0.0000 | 0.0000 |

| Atom |    | 1     | 2      | 3      | 4      | 5      | 6      | 7      | 8      | 9      |
|------|----|-------|--------|--------|--------|--------|--------|--------|--------|--------|
| ---- |    | ----- | -----  | -----  | -----  | -----  | -----  | -----  | -----  | -----  |
| 18.  | C  | t     | 0.0000 | 0.0000 | 0.0000 | 0.0000 | 1.0000 | 0.0000 | 0.0000 | 0.0000 |
|      |    | c     | 0.0000 | 0.0000 | 0.0000 | 0.0000 | 0.9946 | 0.0000 | 0.0000 | 0.0000 |
|      |    | i     | 0.0000 | 0.0000 | 0.0000 | 0.0000 | 0.0054 | 0.0000 | 0.0000 | 0.0000 |
| 19.  | C  | t     | 0.0000 | 0.0000 | 0.0000 | 0.0000 | 1.0000 | 0.0000 | 0.0000 | 0.0000 |
|      |    | c     | 0.0000 | 0.0000 | 0.0000 | 0.0000 | 0.9974 | 0.0000 | 0.0000 | 0.0000 |
|      |    | i     | 0.0000 | 0.0000 | 0.0000 | 0.0000 | 0.0026 | 0.0000 | 0.0000 | 0.0000 |
| 20.  | C  | t     | 0.0000 | 1.0000 | 0.0000 | 0.0000 | 0.0000 | 0.0000 | 0.0000 | 0.0000 |
|      |    | c     | 0.0000 | 0.9954 | 0.0000 | 0.0000 | 0.0000 | 0.0000 | 0.0000 | 0.0000 |
|      |    | i     | 0.0000 | 0.0046 | 0.0000 | 0.0000 | 0.0000 | 0.0000 | 0.0000 | 0.0000 |
| 21.  | C  | t     | 0.0000 | 1.0000 | 0.0000 | 0.0000 | 0.0000 | 0.0000 | 0.0000 | 0.0000 |
|      |    | c     | 0.0000 | 0.9979 | 0.0000 | 0.0000 | 0.0000 | 0.0000 | 0.0000 | 0.0000 |
|      |    | i     | 0.0000 | 0.0021 | 0.0000 | 0.0000 | 0.0000 | 0.0000 | 0.0000 | 0.0000 |
| 22.  | Cu | t     | 0.0000 | 0.0000 | 1.0000 | 0.0000 | 0.0000 | 0.0000 | 0.0000 | 0.0000 |
|      |    | c     | 0.0000 | 0.0000 | 0.3081 | 0.0000 | 0.0000 | 0.0000 | 0.0000 | 0.0000 |
|      |    | i     | 0.0000 | 0.0000 | 0.6919 | 0.0000 | 0.0000 | 0.0000 | 0.0000 | 0.0000 |

| Atom |   | 10    | 11     | 12     | 13     | 14     | 15     | 16     | 17     | 18     |
|------|---|-------|--------|--------|--------|--------|--------|--------|--------|--------|
| ---- |   | ----- | -----  | -----  | -----  | -----  | -----  | -----  | -----  | -----  |
| 5.   | C | t     | 0.0000 | 0.0000 | 0.0000 | 0.0000 | 0.0000 | 0.0000 | 0.0000 | 1.0000 |
|      |   | c     | 0.0000 | 0.0000 | 0.0000 | 0.0000 | 0.0000 | 0.0000 | 0.0000 | 0.9946 |
|      |   | i     | 0.0000 | 0.0000 | 0.0000 | 0.0000 | 0.0000 | 0.0000 | 0.0000 | 0.0054 |
| 6.   | C | t     | 0.0000 | 1.5594 | 0.0000 | 0.0000 | 0.0000 | 0.0000 | 0.0000 | 0.0000 |
|      |   | c     | 0.0000 | 1.4907 | 0.0000 | 0.0000 | 0.0000 | 0.0000 | 0.0000 | 0.0000 |
|      |   | i     | 0.0000 | 0.0687 | 0.0000 | 0.0000 | 0.0000 | 0.0000 | 0.0000 | 0.0000 |
| 7.   | C | t     | 0.0000 | 0.0000 | 1.0000 | 0.0000 | 0.0000 | 0.0000 | 0.0000 | 0.0000 |
|      |   | c     | 0.0000 | 0.0000 | 0.9704 | 0.0000 | 0.0000 | 0.0000 | 0.0000 | 0.0000 |
|      |   | i     | 0.0000 | 0.0000 | 0.0296 | 0.0000 | 0.0000 | 0.0000 | 0.0000 | 0.0000 |
| 8.   | C | t     | 0.0000 | 0.0000 | 0.0000 | 0.0000 | 0.0000 | 0.0000 | 0.0000 | 0.0000 |
|      |   | c     | 0.0000 | 0.0000 | 0.0000 | 0.0000 | 0.0000 | 0.0000 | 0.0000 | 0.0000 |
|      |   | i     | 0.0000 | 0.0000 | 0.0000 | 0.0000 | 0.0000 | 0.0000 | 0.0000 | 0.0000 |
| 9.   | C | t     | 1.5580 | 0.0000 | 0.0000 | 0.0000 | 0.0000 | 0.0000 | 0.0000 | 0.0000 |
|      |   | c     | 1.5359 | 0.0000 | 0.0000 | 0.0000 | 0.0000 | 0.0000 | 0.0000 | 0.0000 |
|      |   | i     | 0.0221 | 0.0000 | 0.0000 | 0.0000 | 0.0000 | 0.0000 | 0.0000 | 0.0000 |
| 10.  | C | t     | 0.1064 | 1.2216 | 0.0000 | 0.0000 | 0.0000 | 0.0000 | 0.0000 | 0.0000 |
|      |   | c     | ---    | 1.2105 | 0.0000 | 0.0000 | 0.0000 | 0.0000 | 0.0000 | 0.0000 |
|      |   | i     | ---    | 0.0111 | 0.0000 | 0.0000 | 0.0000 | 0.0000 | 0.0000 | 0.0000 |
| 11.  | C | t     | 1.2216 | 0.1194 | 0.0000 | 0.0000 | 0.0000 | 1.0000 | 0.0000 | 0.0000 |
|      |   | c     | 1.2105 | ---    | 0.0000 | 0.0000 | 0.0000 | 0.9700 | 0.0000 | 0.0000 |
|      |   | i     | 0.0111 | ---    | 0.0000 | 0.0000 | 0.0000 | 0.0300 | 0.0000 | 0.0000 |
| 12.  | C | t     | 0.0000 | 0.0000 | 0.0000 | 1.0000 | 1.0000 | 0.0000 | 0.0000 | 0.0000 |
|      |   | c     | 0.0000 | 0.0000 | ---    | 0.9920 | 0.9930 | 0.0000 | 0.0000 | 0.0000 |
|      |   | i     | 0.0000 | 0.0000 | ---    | 0.0080 | 0.0070 | 0.0000 | 0.0000 | 0.0000 |
| 13.  | C | t     | 0.0000 | 0.0000 | 1.0000 | 0.0000 | 0.0000 | 0.0000 | 0.0000 | 0.0000 |
|      |   | c     | 0.0000 | 0.0000 | 0.9920 | ---    | 0.0000 | 0.0000 | 0.0000 | 0.0000 |
|      |   | i     | 0.0000 | 0.0000 | 0.0080 | ---    | 0.0000 | 0.0000 | 0.0000 | 0.0000 |
| 14.  | C | t     | 0.0000 | 0.0000 | 1.0000 | 0.0000 | 0.0000 | 0.0000 | 0.0000 | 0.0000 |
|      |   | c     | 0.0000 | 0.0000 | 0.9930 | 0.0000 | ---    | 0.0000 | 0.0000 | 0.0000 |
|      |   | i     | 0.0000 | 0.0000 | 0.0070 | 0.0000 | ---    | 0.0000 | 0.0000 | 0.0000 |

| Atom  |    | 10 | 11     | 12     | 13     | 14     | 15     | 16     | 17     | 18     |
|-------|----|----|--------|--------|--------|--------|--------|--------|--------|--------|
| ----- |    |    |        |        |        |        |        |        |        |        |
| 15.   | C  | t  | 0.0000 | 1.0000 | 0.0000 | 0.0000 | 0.0000 | 1.0000 | 1.0000 | 0.0000 |
|       |    | c  | 0.0000 | 0.9700 | 0.0000 | 0.0000 | ---    | 0.9930 | 0.9920 | 0.0000 |
|       |    | i  | 0.0000 | 0.0300 | 0.0000 | 0.0000 | ---    | 0.0070 | 0.0080 | 0.0000 |
|       |    |    |        |        |        |        |        |        |        |        |
| 16.   | C  | t  | 0.0000 | 0.0000 | 0.0000 | 0.0000 | 1.0000 | 0.0000 | 0.0000 | 0.0000 |
|       |    | c  | 0.0000 | 0.0000 | 0.0000 | 0.0000 | 0.9930 | ---    | 0.0000 | 0.0000 |
|       |    | i  | 0.0000 | 0.0000 | 0.0000 | 0.0000 | 0.0070 | ---    | 0.0000 | 0.0000 |
|       |    |    |        |        |        |        |        |        |        |        |
| 17.   | C  | t  | 0.0000 | 0.0000 | 0.0000 | 0.0000 | 1.0000 | 0.0000 | 0.0000 | 0.0000 |
|       |    | c  | 0.0000 | 0.0000 | 0.0000 | 0.0000 | 0.9920 | 0.0000 | ---    | 0.0000 |
|       |    | i  | 0.0000 | 0.0000 | 0.0000 | 0.0000 | 0.0080 | 0.0000 | ---    | 0.0000 |
|       |    |    |        |        |        |        |        |        |        |        |
| Atom  |    | 19 | 20     | 21     | 22     | 23     | 24     | 25     | 26     | 27     |
| ----- |    |    |        |        |        |        |        |        |        |        |
| 1.    | C  | t  | 0.0000 | 0.0000 | 0.0000 | 0.0000 | 0.0000 | 0.0000 | 0.0000 | 0.0000 |
|       |    | c  | 0.0000 | 0.0000 | 0.0000 | 0.0000 | 0.0000 | 0.0000 | 0.0000 | 0.0000 |
|       |    | i  | 0.0000 | 0.0000 | 0.0000 | 0.0000 | 0.0000 | 0.0000 | 0.0000 | 0.0000 |
|       |    |    |        |        |        |        |        |        |        |        |
| 2.    | C  | t  | 0.0000 | 1.0000 | 1.0000 | 0.0000 | 0.0000 | 0.0000 | 0.0000 | 0.0000 |
|       |    | c  | 0.0000 | 0.9954 | 0.9979 | 0.0000 | 0.0000 | 0.0000 | 0.0000 | 0.0000 |
|       |    | i  | 0.0000 | 0.0046 | 0.0021 | 0.0000 | 0.0000 | 0.0000 | 0.0000 | 0.0000 |
|       |    |    |        |        |        |        |        |        |        |        |
| 3.    | C  | t  | 0.0000 | 0.0000 | 0.0000 | 1.0000 | 0.0000 | 0.0000 | 0.0000 | 0.0000 |
|       |    | c  | 0.0000 | 0.0000 | 0.0000 | 0.3081 | 0.0000 | 0.0000 | 0.0000 | 0.0000 |
|       |    | i  | 0.0000 | 0.0000 | 0.0000 | 0.6919 | 0.0000 | 0.0000 | 0.0000 | 0.0000 |
|       |    |    |        |        |        |        |        |        |        |        |
| 22.   | Cu | t  | 0.0000 | 0.0000 | 0.0000 | 4.6313 | 0.3390 | 0.0000 | 0.0000 | 0.0000 |
|       |    | c  | 0.0000 | 0.0000 | 0.0000 | ---    | 0.0651 | 0.0000 | 0.0000 | 0.0000 |
|       |    | i  | 0.0000 | 0.0000 | 0.0000 | ---    | 0.2740 | 0.0000 | 0.0000 | 0.0000 |
|       |    |    |        |        |        |        |        |        |        |        |
| 23.   | Cl | t  | 0.0000 | 0.0000 | 0.0000 | 0.3390 | 3.6610 | 0.0000 | 0.0000 | 0.0000 |
|       |    | c  | 0.0000 | 0.0000 | 0.0000 | 0.0651 | ---    | 0.0000 | 0.0000 | 0.0000 |
|       |    | i  | 0.0000 | 0.0000 | 0.0000 | 0.2740 | ---    | 0.0000 | 0.0000 | 0.0000 |

**Table S6.** Total scattering intensities and background lines for **(1)** molecule

## Curve LD

| s     | Total Int | Background | s     | Total Int | Background |
|-------|-----------|------------|-------|-----------|------------|
| 4.20  | 0.28005   | 0.29433    | 10.20 | 0.24678   | 0.24465    |
| 4.40  | 0.28390   | 0.29827    | 10.40 | 0.24441   | 0.24238    |
| 4.60  | 0.28741   | 0.30201    | 10.60 | 0.24148   | 0.24011    |
| 4.80  | 0.29474   | 0.30533    | 10.80 | 0.23809   | 0.23790    |
| 5.00  | 0.30789   | 0.30797    | 11.00 | 0.23440   | 0.23577    |
| 5.20  | 0.32395   | 0.30959    | 11.20 | 0.23094   | 0.23377    |
| 5.40  | 0.33363   | 0.30987    | 11.40 | 0.22779   | 0.23191    |
| 5.60  | 0.33415   | 0.30876    | 11.60 | 0.22560   | 0.23023    |
| 5.80  | 0.32711   | 0.30639    | 11.80 | 0.22451   | 0.22873    |
| 6.00  | 0.31742   | 0.30302    | 12.00 | 0.22428   | 0.22735    |
| 6.20  | 0.30647   | 0.29895    | 12.20 | 0.22413   | 0.22606    |
| 6.40  | 0.29553   | 0.29453    | 12.40 | 0.22415   | 0.22481    |
| 6.60  | 0.28556   | 0.29010    | 12.60 | 0.22416   | 0.22356    |
| 6.80  | 0.27784   | 0.28593    | 12.80 | 0.22439   | 0.22228    |
| 7.00  | 0.27359   | 0.28216    | 13.00 | 0.22441   | 0.22094    |
| 7.20  | 0.27220   | 0.27883    | 13.20 | 0.22377   | 0.21950    |
| 7.40  | 0.27151   | 0.27590    | 13.40 | 0.22248   | 0.21798    |
| 7.60  | 0.27074   | 0.27331    | 13.60 | 0.22023   | 0.21640    |
| 7.80  | 0.26965   | 0.27097    | 13.80 | 0.21744   | 0.21484    |
| 8.00  | 0.26819   | 0.26876    | 14.00 | 0.21431   | 0.21336    |
| 8.20  | 0.26599   | 0.26660    | 14.20 | 0.21150   | 0.21203    |
| 8.40  | 0.26399   | 0.26444    | 14.40 | 0.20929   | 0.21090    |
| 8.60  | 0.26262   | 0.26227    | 14.60 | 0.20791   | 0.20998    |
| 8.80  | 0.26148   | 0.26008    | 14.80 | 0.20757   | 0.20925    |
| 9.00  | 0.25993   | 0.25786    | 15.00 | 0.20762   | 0.20862    |
| 9.20  | 0.25747   | 0.25563    | 15.20 | 0.20742   | 0.20804    |
| 9.40  | 0.25457   | 0.25342    | 15.40 | 0.20707   | 0.20746    |
| 9.60  | 0.25191   | 0.25125    | 15.60 | 0.20645   | 0.20687    |
| 9.80  | 0.25013   | 0.24908    | 15.80 | 0.20572   | 0.20630    |
| 10.00 | 0.24860   | 0.24689    | 16.00 | 0.20526   | 0.20574    |

## Curve SD

| s     | Total Int | Background | s     | Total Int | Background |
|-------|-----------|------------|-------|-----------|------------|
| 13.00 | 1.02780   | 1.01634    | 22.40 | 1.05040   | 1.05025    |
| 13.20 | 1.03120   | 1.01626    | 22.60 | 1.05070   | 1.05113    |
| 13.40 | 1.03170   | 1.01620    | 22.80 | 1.05110   | 1.05200    |
| 13.60 | 1.02910   | 1.01618    | 23.00 | 1.05160   | 1.05286    |
| 13.80 | 1.02480   | 1.01625    | 23.20 | 1.05220   | 1.05372    |
| 14.00 | 1.01990   | 1.01644    | 23.40 | 1.05310   | 1.05458    |
| 14.20 | 1.01560   | 1.01670    | 23.60 | 1.05430   | 1.05544    |
| 14.40 | 1.01280   | 1.01695    | 23.80 | 1.05550   | 1.05631    |
| 14.60 | 1.01170   | 1.01714    | 24.00 | 1.05690   | 1.05718    |
| 14.80 | 1.01170   | 1.01725    | 24.20 | 1.05830   | 1.05804    |
| 15.00 | 1.01240   | 1.01737    | 24.40 | 1.05960   | 1.05891    |
| 15.20 | 1.01360   | 1.01761    | 24.60 | 1.06100   | 1.05978    |
| 15.40 | 1.01510   | 1.01806    | 24.80 | 1.06220   | 1.06065    |
| 15.60 | 1.01660   | 1.01873    | 25.00 | 1.06330   | 1.06152    |
| 15.80 | 1.01810   | 1.01958    | 25.20 | 1.06410   | 1.06239    |
| 16.00 | 1.01920   | 1.02048    | 25.40 | 1.06480   | 1.06327    |
| 16.20 | 1.01990   | 1.02134    | 25.60 | 1.06520   | 1.06415    |
| 16.40 | 1.02010   | 1.02212    | 25.80 | 1.06550   | 1.06505    |
| 16.60 | 1.01990   | 1.02287    | 26.00 | 1.06570   | 1.06596    |

|       |         |         |       |         |         |
|-------|---------|---------|-------|---------|---------|
| 16.80 | 1.02000 | 1.02365 | 26.20 | 1.06610 | 1.06689 |
| 17.00 | 1.02090 | 1.02455 | 26.40 | 1.06660 | 1.06786 |
| 17.20 | 1.02300 | 1.02558 | 26.60 | 1.06740 | 1.06885 |
| 17.40 | 1.02580 | 1.02669 | 26.80 | 1.06840 | 1.06987 |
| 17.60 | 1.02890 | 1.02782 | 27.00 | 1.06960 | 1.07093 |
| 17.80 | 1.03210 | 1.02891 | 27.20 | 1.07100 | 1.07202 |
| 18.00 | 1.03500 | 1.02992 | 27.40 | 1.07250 | 1.07314 |
| 18.20 | 1.03730 | 1.03086 | 27.60 | 1.07390 | 1.07428 |
| 18.40 | 1.03860 | 1.03173 | 27.80 | 1.07540 | 1.07547 |
| 18.60 | 1.03880 | 1.03258 | 28.00 | 1.07680 | 1.07669 |
| 18.80 | 1.03790 | 1.03342 | 28.20 | 1.07820 | 1.07796 |
| 19.00 | 1.03650 | 1.03428 | 28.40 | 1.07970 | 1.07927 |
| 19.20 | 1.03490 | 1.03515 | 28.60 | 1.08110 | 1.08063 |
| 19.40 | 1.03370 | 1.03603 | 28.80 | 1.08260 | 1.08204 |
| 19.60 | 1.03320 | 1.03693 | 29.00 | 1.08400 | 1.08347 |
| 19.80 | 1.03330 | 1.03783 | 29.20 | 1.08550 | 1.08491 |
| 20.00 | 1.03410 | 1.03875 | 29.40 | 1.08700 | 1.08634 |
| 20.20 | 1.03560 | 1.03970 | 29.60 | 1.08840 | 1.08773 |
| 20.40 | 1.03780 | 1.04069 | 29.80 | 1.08940 | 1.08907 |
| 20.60 | 1.04040 | 1.04172 | 30.00 | 1.09060 | 1.09038 |
| 20.80 | 1.04280 | 1.04276 | 30.20 | 1.09170 | 1.09166 |
| 21.00 | 1.04500 | 1.04378 | 30.40 | 1.09290 | 1.09290 |
| 21.20 | 1.04660 | 1.04477 | 30.60 | 1.09410 | 1.09412 |
| 21.40 | 1.04760 | 1.04572 | 30.80 | 1.09520 | 1.09529 |
| 21.60 | 1.04830 | 1.04664 | 31.00 | 1.09630 | 1.09643 |
| 21.80 | 1.04900 | 1.04755 | 31.20 | 1.09730 | 1.09752 |
| 22.00 | 1.04960 | 1.04846 | 31.40 | 1.09820 | 1.09858 |
| 22.20 | 1.05010 | 1.04936 | 31.60 | 1.09880 | 1.09961 |
| 13.00 | 1.02780 | 1.01634 | 22.40 | 1.05040 | 1.05025 |

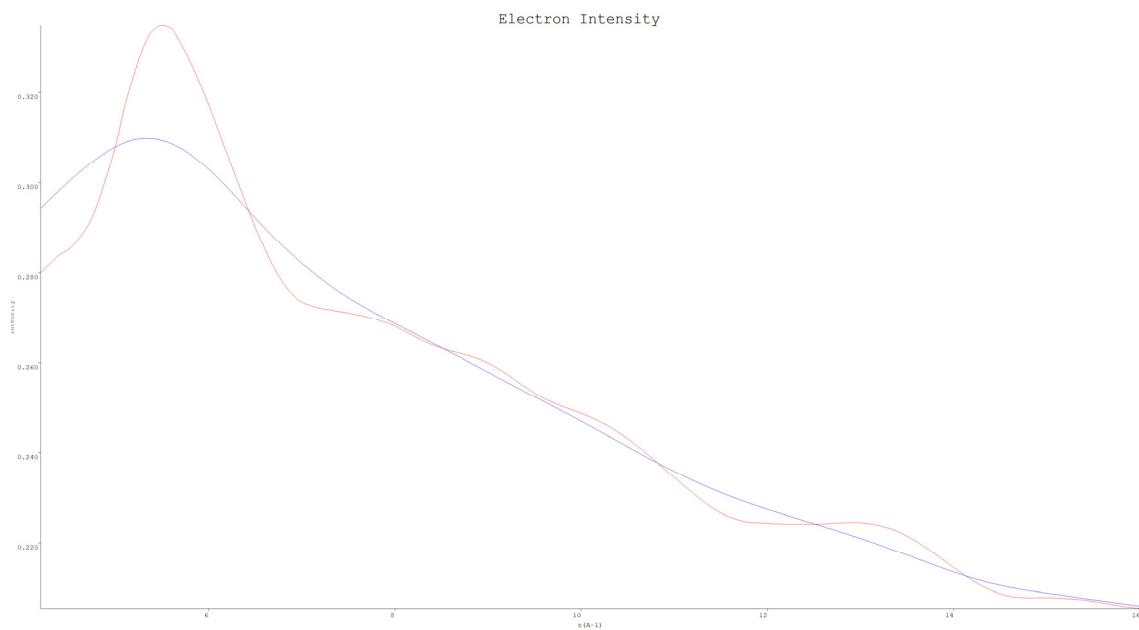

**Figure S1.** Total experimental scattering intensity curve and background line for(1), (LD)



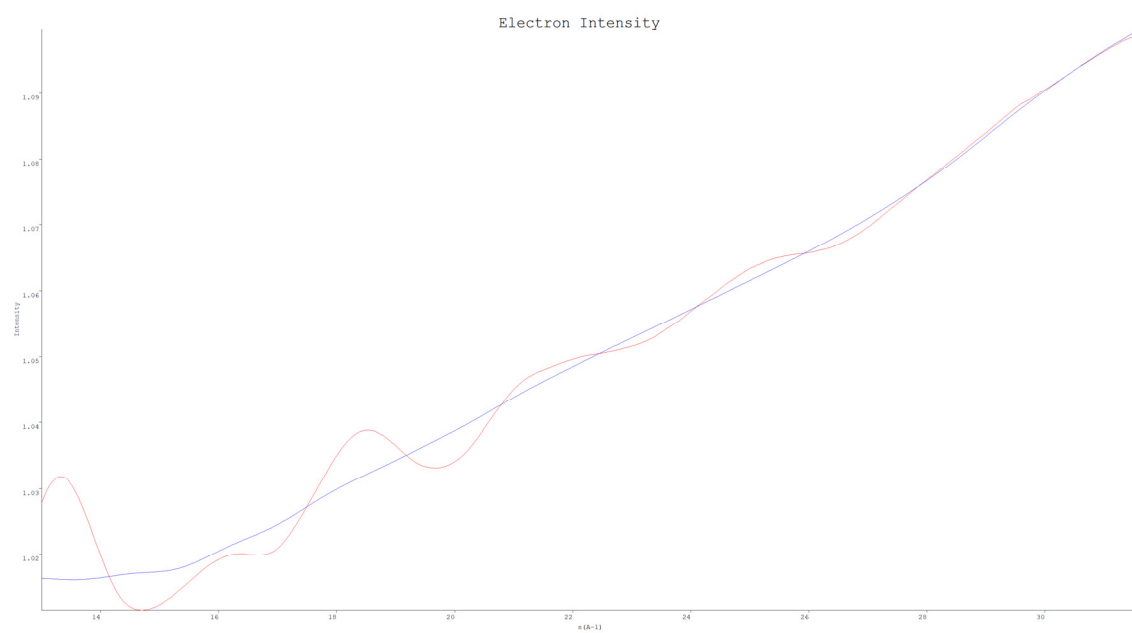

**Figure S2.** Total experimental scattering intensity curve and background line for(1), (SD)
